# Supplementary material for: ESM1 promotes angiogenesis in colorectal cancer by activating PI3K/Akt/mTOR pathway, thus accelerating tumor progression
Source: PubMed Central journal article supplement (PMC10188330; doi:10.18632/aging.204559), 2023-03-07
Supplement: aging-15-204559-s001.pdf [file aging-15-204559-s001.pdf]

**SUPPLEMENTARY FIGURE**

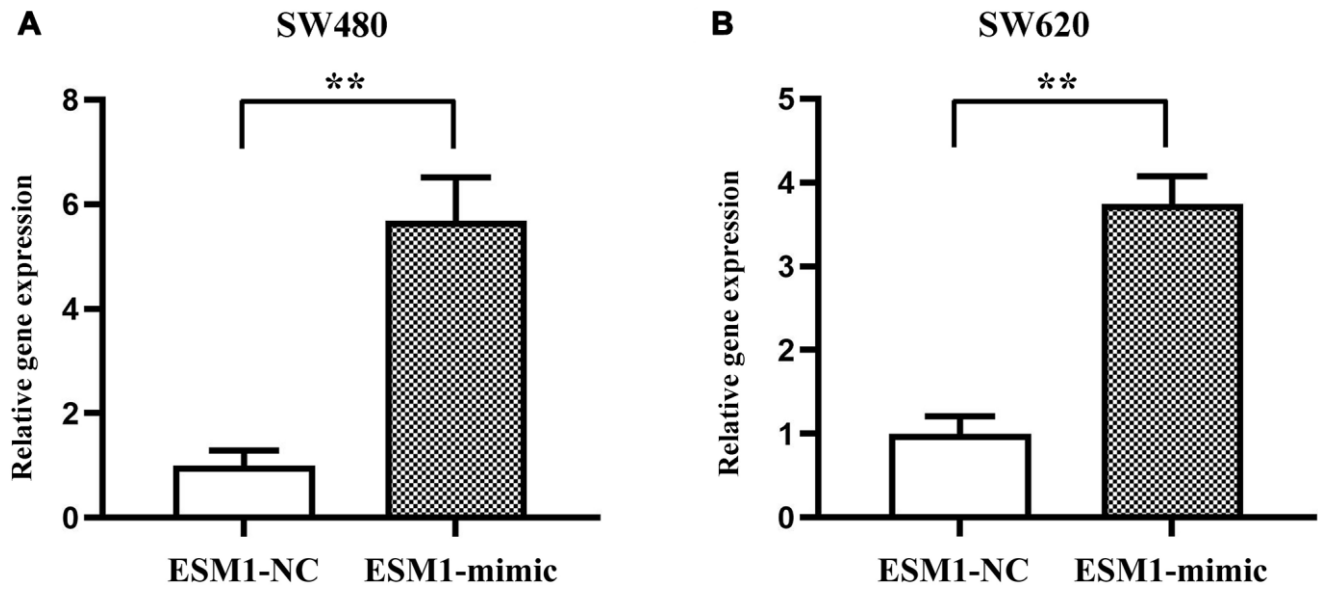

**Supplementary Figure 1. Q-PCR verified that ESM1 transfection was successful.** (A, B) Expression of ESM1 in the ESM1-NC and ESM1-mimic groups in sw480 and sw620 cells. The expression of ESM1 in the ESM1-mimic group increased significantly relative to the ESM1-NC group. \*\* $P < 0.01$ .
